# Supplementary material
Source: publisher figshare collection journal article supplement (https://frontiersin.figshare.com/ndownloader/files/24632450)
Supplement: Supplementary file 1 [file 24632450]

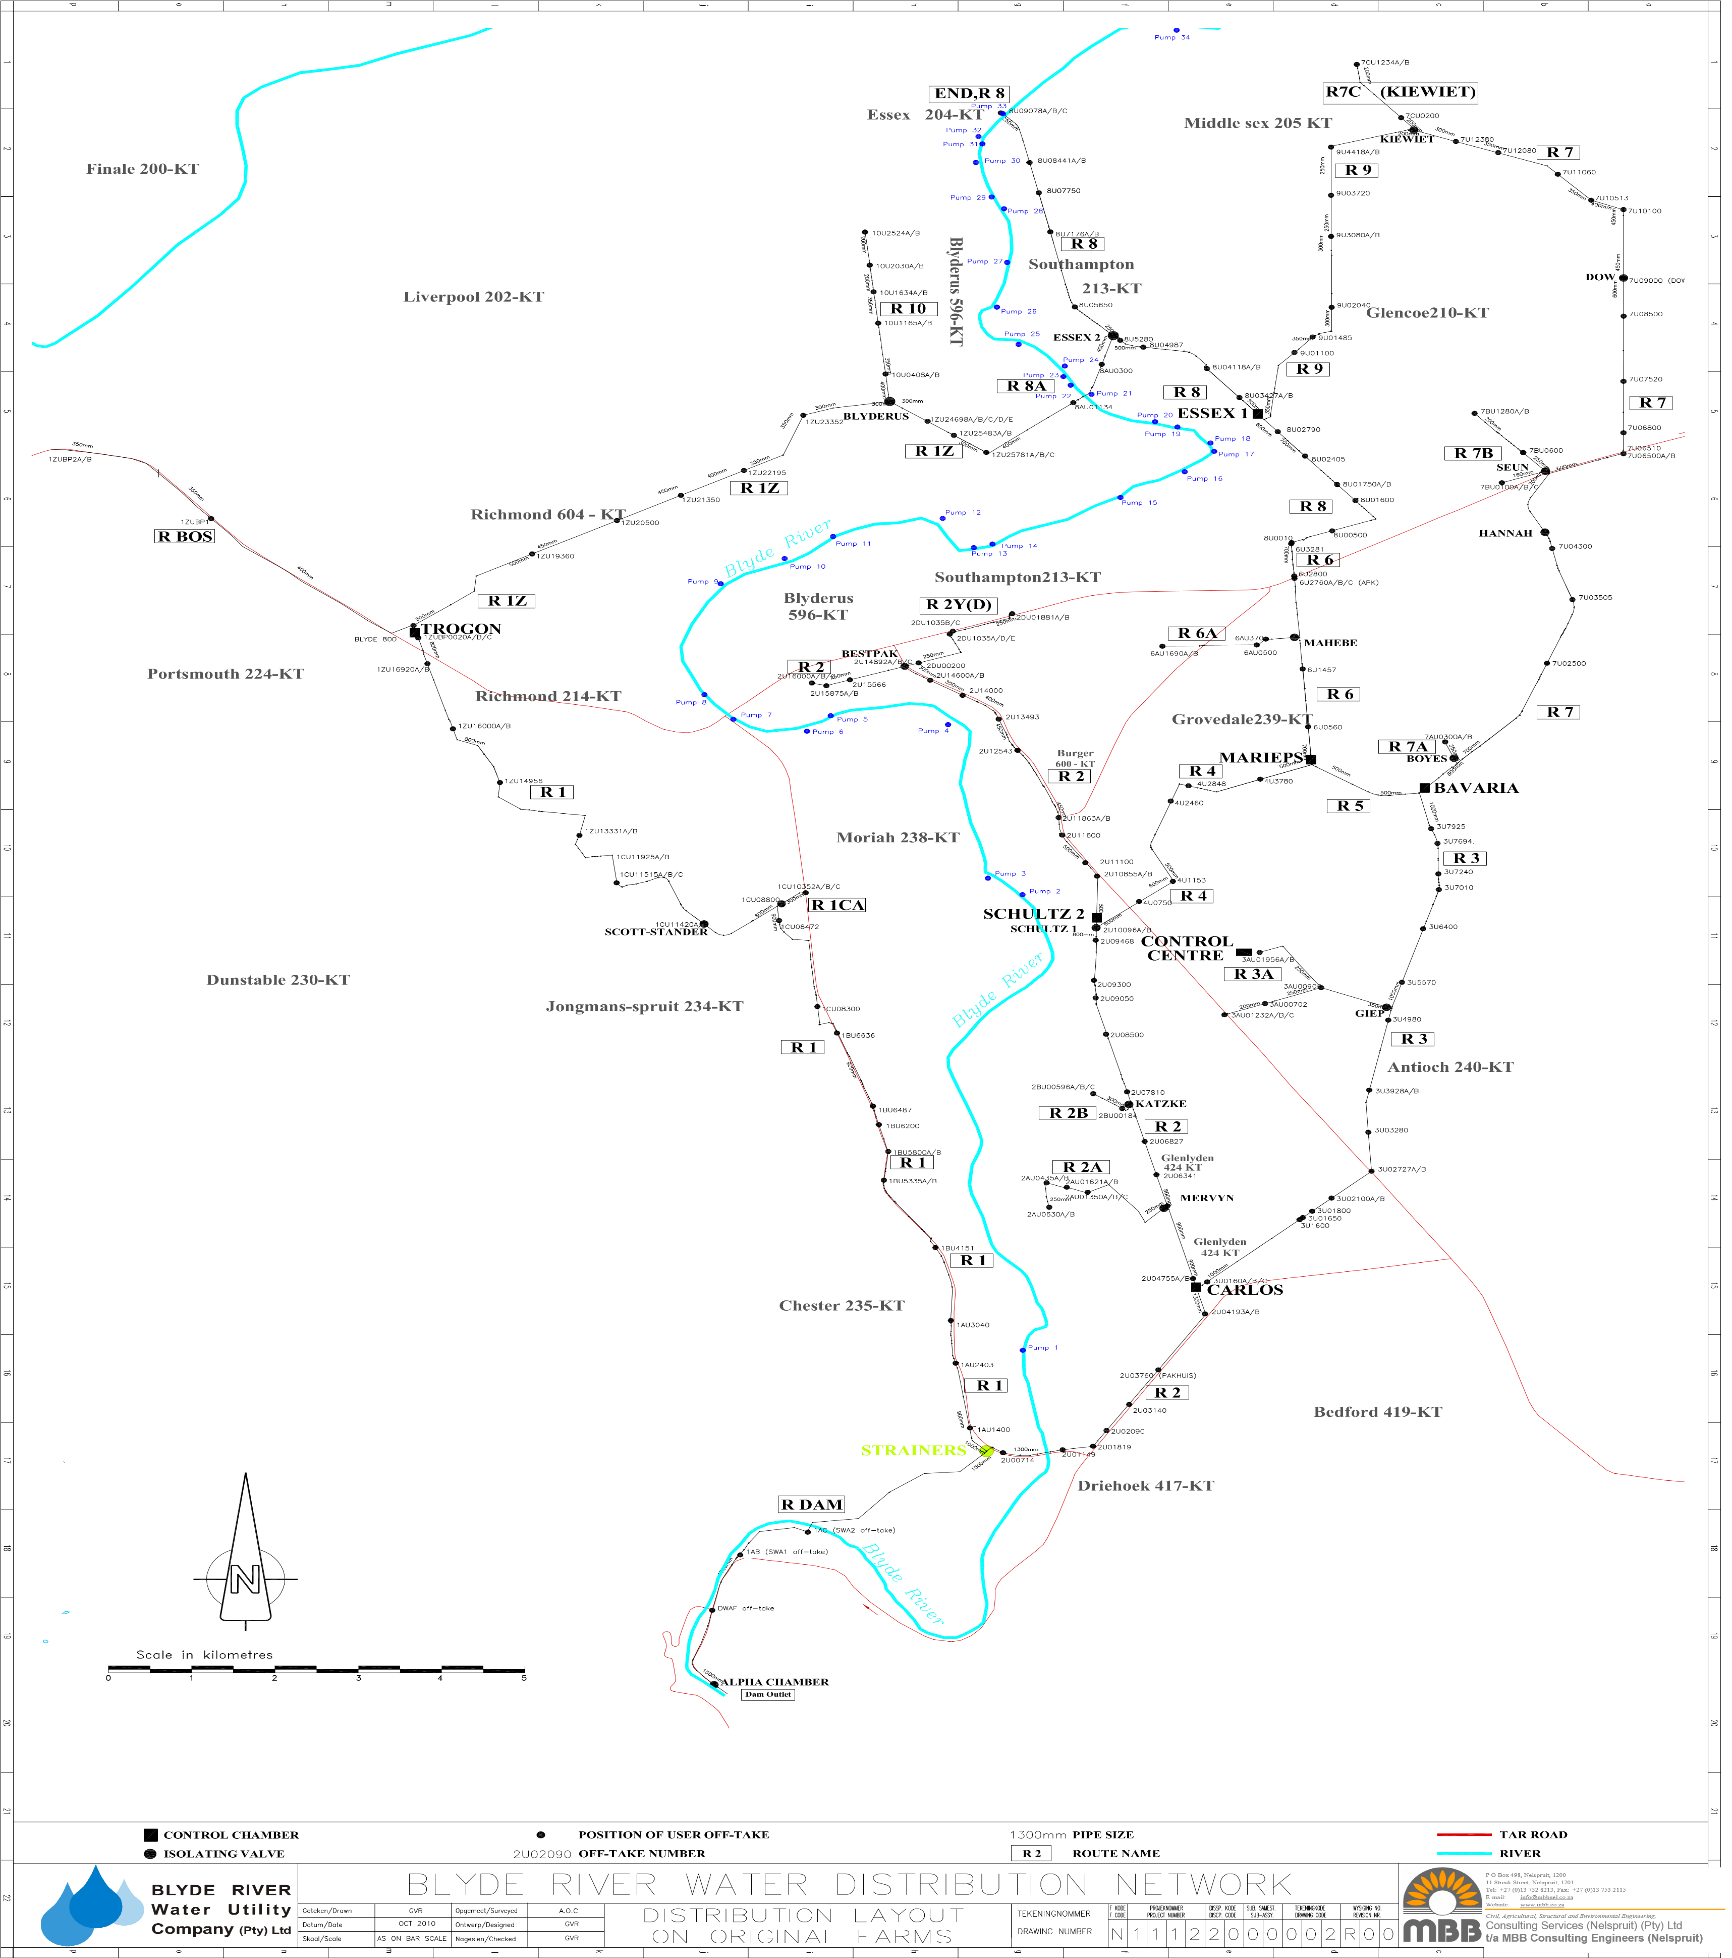
**Supplement A** - Schematic layout of the LBIS located downstream from the Blyderiver dam in Mpumalanga and Limpopo provinces, SA. LBIS 1 – LBIS 10 indicate sampling sites (Courtesy of Mr Org van Rensburg, MBB Consulting Engineers).

**LBIS 5**

**Blyderiver Dam**

**LBIS 3**

**LBIS 10**

**LBIS 9**

**LBIS 8**

**LBIS 7**

**LBIS 6**

**LBIS 4**

**LBIS 2**

**LBIS 1**
